# Supplementary material
Source: publisher site journal article supplement (https://www.spandidos-publications.com/1147/downloadSupplementary)

Figure S1. Role of GPR30 in breast cancer cell viability. Time course of the effects of different concentrations of the GPR30 agonist G1 on the viability of MCF-7 and MDA-MB-231. Data are presented as the mean  $\pm$  SD from three independent experiments performed at least in triplicate. \*\*\* $P$ <0.001 vs. Vehicle. GPR30, G protein-coupled receptor 30.

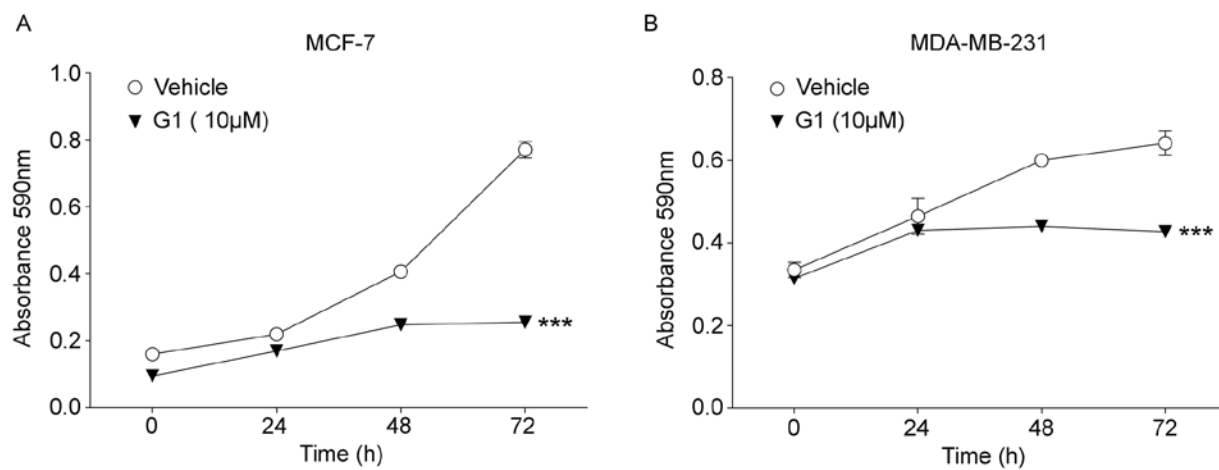

Figure S2. Role of GPR30 in the migration of non-invasive breast cancer cells. Effect of the GPR30 activation by G1 and of the G1/G15 competition on the migratory ability of the MCF-7 cell line, measured in terms of wound thickness, obtained every 24 h from seven quadrants per cell. Data are presented as the mean  $\pm$  SD from three independent experiments performed at least in triplicate. G1, GPR30 agonist; G15, GPR30 antagonist; GPR30, G protein-coupled receptor 30.

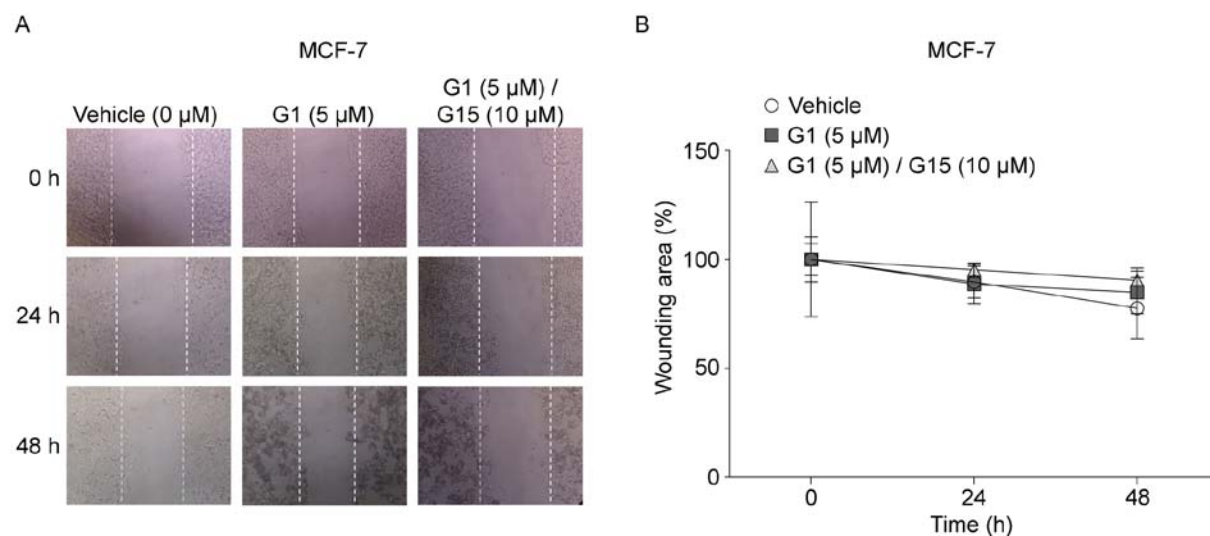

Supplement: Supplementary file 1 [file downloadSupplementary]
